# Supplementary material for: Band alignment by ternary crystalline potential-tuning interlayer for efficient electron injection in quantum dot-sensitized solar cells
Source: Royal Society of Chemistry journal article supplement (doi:10.1039/c3ta15435a), 2014-01-01
Supplement: c3ta15435a1.pdf [file c3ta15435a1.pdf]

## Supporting Information

# Band Alignment by Ternary Crystalline Potential-Tuning Interlayer for Efficient Electron Injection in Quantum Dot-Sensitized Solar Cells

5 Zhenhua Chen<sup>a</sup>, Wenqin Peng<sup>a</sup>, Kun Zhang<sup>a</sup>, Jing Zhang<sup>a</sup>, Xudong Yang<sup>a,\*</sup>, Youhei Numata<sup>a</sup>, and Liyuan Han<sup>a,b\*</sup>

<sup>a</sup>Photovoltaic Materials Unit, National Institute for Materials Science (NIMS), Tsukuba, Ibaraki, 305-0047, Japan

<sup>b</sup>State Key Laboratory of Metal Matrix Composites, Shanghai Jiaotong University, Shanghai 200240, China

10

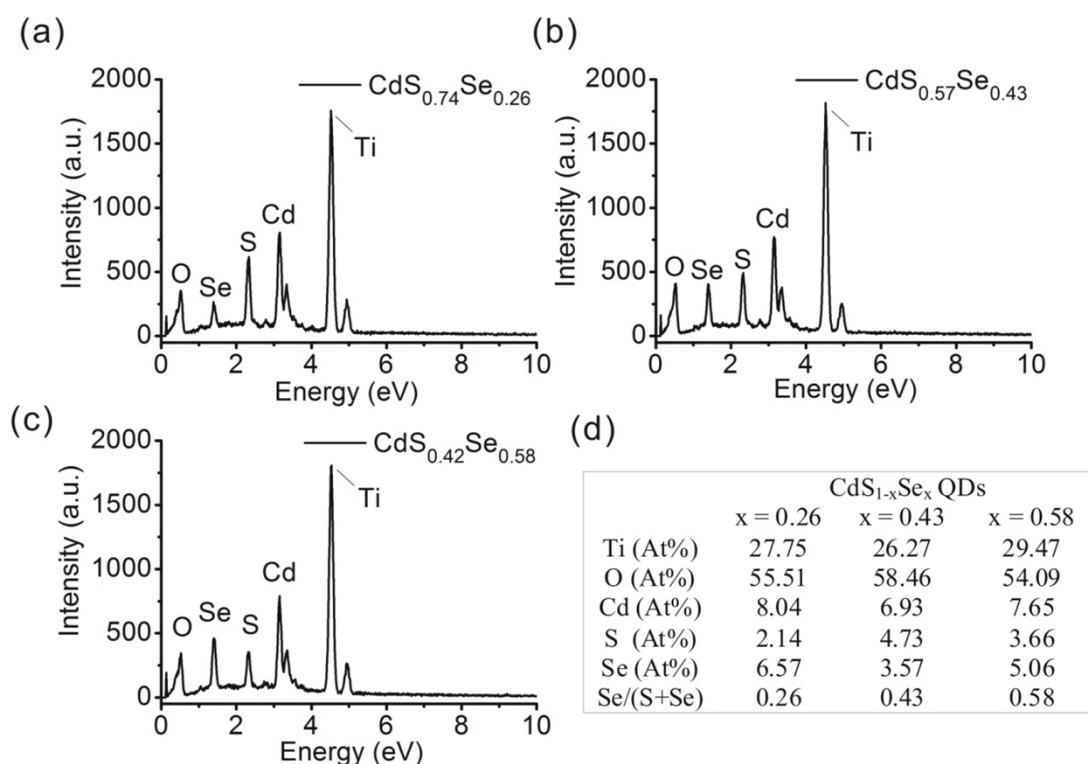

**Fig. S1** EDX spectrum of ternary CdS<sub>0.74</sub>Se<sub>0.26</sub> QDs (Figure S1a), CdS<sub>0.57</sub>Se<sub>0.43</sub> QDs (Figure S1b), and CdS<sub>0.42</sub>Se<sub>0.58</sub> QDs (Figure S1c), with specific elemental peaks. These peaks are as follows: Titanium K<sub>α</sub>=4.51 keV and K<sub>β</sub>=4.93 keV, Oxygen K<sub>α</sub>=0.52 keV, Cadmium L<sub>α</sub>=3.13 keV and L<sub>β</sub>=3.31 keV, Sulfur K<sub>α</sub>=2.37 keV and Selenium L<sub>α</sub>=1.37 keV. The detailed composition of elements in CdS<sub>1-x</sub>Se<sub>x</sub> QDs have been listed in Figure S1d.

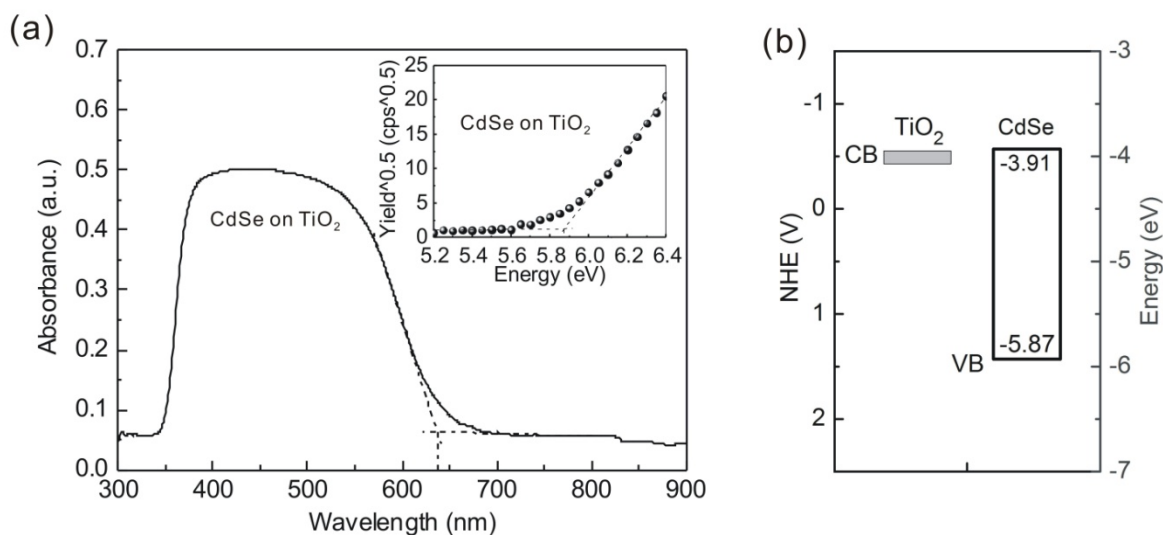

**Fig. S2** (a) Absorbance spectrum of CdSe QDs decorated TiO<sub>2</sub> nanoparticles by SILAR process (7 cycles). The inset is its corresponding ionization spectra. (b) Band diagram at the TiO<sub>2</sub>/CdSe interface.

5

Fig. S3a shows scanning electron micrographs of bare TiO<sub>2</sub> nanoparticles (upper part) and TiO<sub>2</sub> nanoparticles decorated with CdS<sub>0.57</sub>Se<sub>0.43</sub>/CdSe QDs (lower part). The transparent TiO<sub>2</sub> nanoparticles we prepared had an average diameter of 25 nm with a pore size of 25.0 ± 4 nm, as determined by the Brunauer–Emmett–Teller method. After coverage with the CdS<sub>0.57</sub>Se<sub>0.43</sub>/CdSe QDs, the surface of the 10 TiO<sub>2</sub> nanoparticles was rough and the pore size became smaller. The double-layer CdS<sub>0.57</sub>Se<sub>0.43</sub>/CdSe QDs were effectively loaded onto the TiO<sub>2</sub> film, as demonstrated in the cross-sectional scanning electron micrograph shown in Fig. S3b. Cross-sectional mapping of Cd, S, and Se indicates that these elements were uniformly distributed throughout the photoanode.

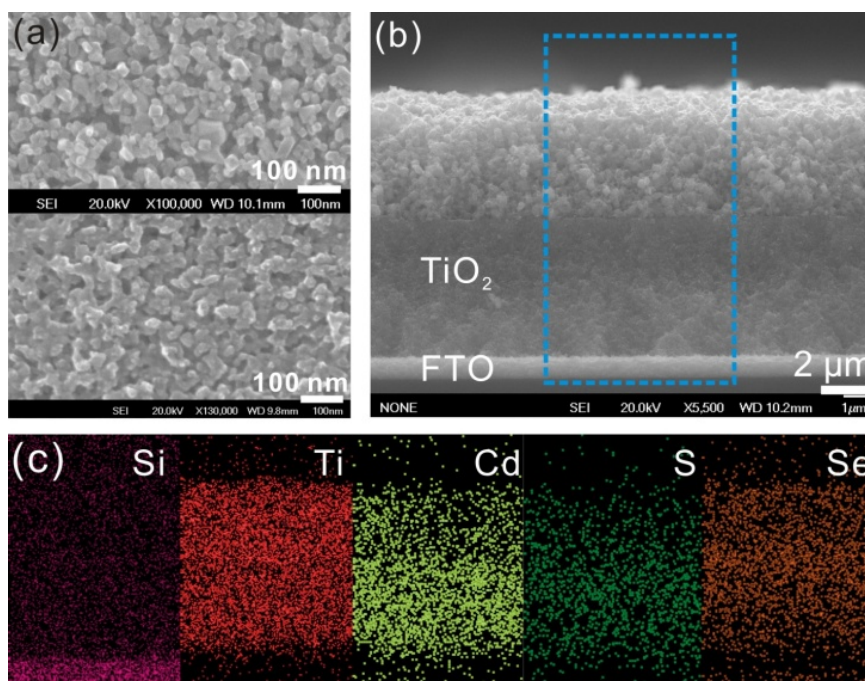

**Fig. S3** (a) Scanning electron micrographs of bare TiO<sub>2</sub> nanoparticles (upper image) and CdS<sub>0.57</sub>Se<sub>0.43</sub>/CdSe QD-decorated TiO<sub>2</sub> nanoparticles (lower image). (b) Cross-section scanning electron micrograph of the mesoporous TiO<sub>2</sub> substrate consisting of a 5-μm-thick, dense, transparent layer of TiO<sub>2</sub> nanoparticles (diameter ~25 nm) and a 5-μm-thick scattering layer (diameter ~400 nm). (c) Elemental mapping of Si, Ti, Cd, S, and Se in a QD-sensitized TiO<sub>2</sub> film.

We determined the LHEs of the CdS/CdSe QDs and three types of CdS<sub>1-x</sub>Se<sub>x</sub> QDs/CdSe QDs ( $x = 0.26, 0.43, \text{ and } 0.58$ ) on a thin cover glass (0.14 mm) to avoid scattered light leaks from the glass substrate side. The transmittance and reflectance spectra of bare TiO<sub>2</sub> film are shown in Fig. S4a. The light collection obtained by adding the transmittance and reflectance spectra approached 100% above 400 nm. Fig. S4b shows the LHE of QD-sensitized films; light harvesting below 400 nm was assigned to absorption by the TiO<sub>2</sub> film. The band edge of the LHE spectra in Fig. 4b was kept at 710 nm for the different double-layer QDs. The LHEs of the QDs approached 90% at 550 nm owing to the high

extinction coefficient of semiconductor QDs, the concentration of QDs, and the thickness of the absorbing layer we used.

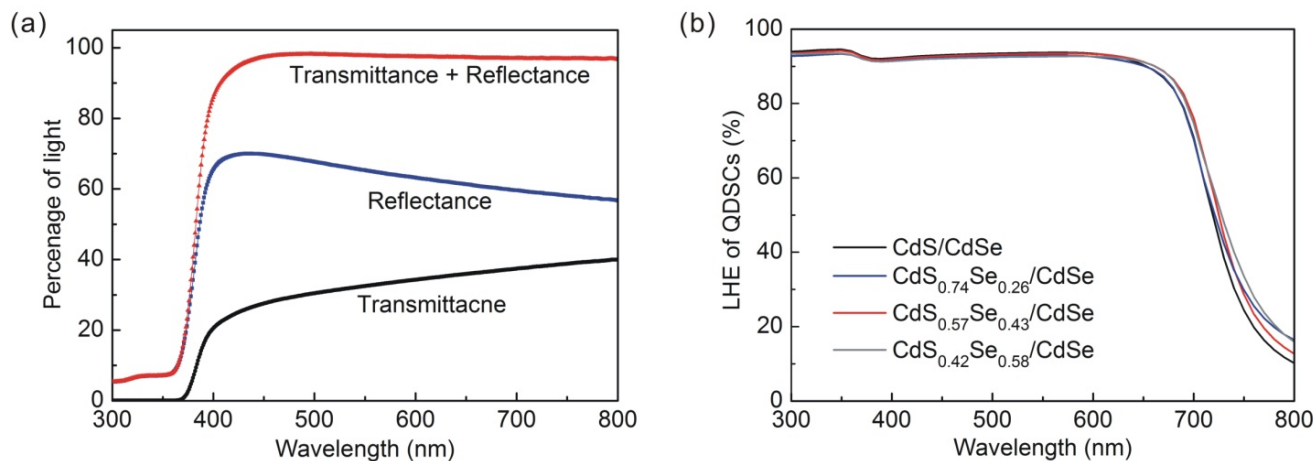

**Fig. S4** (a) Reflectance, transmittance spectrum and the sum of them for bare TiO<sub>2</sub> film. The construction of this measurement is composed by thin cover glass, deposited bare TiO<sub>2</sub> film and the other thin cover glass with aqueous solution, to model electrolyte in real solar cells.<sup>28</sup> (b) LHE of QDSCs vs. wavelength calculated for both CdS/CdSe and CdS<sub>1-x</sub>Se<sub>x</sub>/CdSe QDSCs (x=0.26, 0.43, 0.58).

10 The  $\tau_{sc}$  values can be calculated as  $\tau_{sc} = 1/\omega_{min,sc} = 1/2\pi f_{min,sc}$ , where  $f_{min,sc}$  is the frequency of the lowest imaginary number in the IMPS plot. The  $\tau_{oc}$  values can be calculated as  $\tau_{oc} = 1/\omega_{min,oc} = 1/2\pi f_{min,oc}$ , where  $f_{min,oc}$  is the frequency of the lowest imaginary number in the IMVS plot.

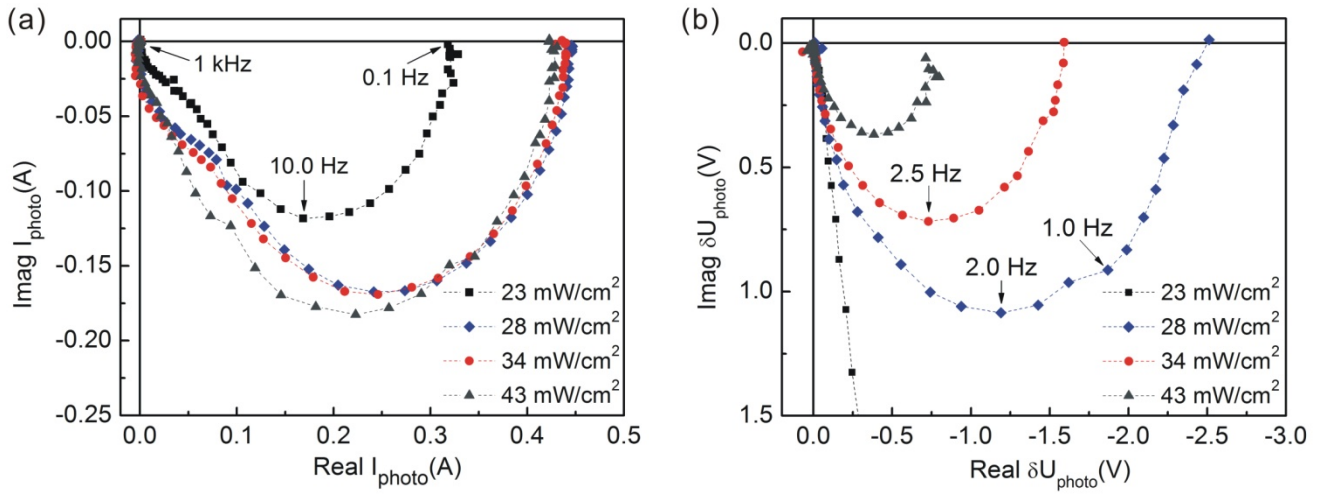

**Fig. S5** (a) IMPS and (b) IMVS spectra of CdS<sub>0.57</sub>Se<sub>0.43</sub>/CdSe QDSCs measured under varying level of laser intensities ( $\lambda=446$  nm). The  $\tau_{sc}$  can be obtained from the frequency of the lowest imaginary in the IMPS plot while  $\tau_{oc}$  can be calculated from the frequency of the lowest imaginary in the IMVS plot.

10

15

20

25

**Table S1** Values of  $\tau_{oc}$ ,  $\tau_{sc}$ , and  $\eta_{coll}$  for QDSCs under varying light intensities ( $\lambda = 446$  nm) calculated from IMVS and IMPS measurements.

|                                              | Intensity<br>(W/m <sup>2</sup> ) | $\tau_{oc}$<br>(ms) | $\tau_{sc}$<br>(ms) | $\eta_{coll}$<br>(%) |
|----------------------------------------------|----------------------------------|---------------------|---------------------|----------------------|
| CdS/CdSe                                     | 24.1                             | 503.3               | 31.8                | 93.7                 |
|                                              | 30.3                             | 63.4                | 5.0                 | 92.1                 |
|                                              | 37.5                             | 50.3                | 2.5                 | 95.0                 |
|                                              | 46.6                             | 25.2                | 1.6                 | 93.7                 |
| CdS <sub>0.74</sub> Se <sub>0.26</sub> /CdSe | 24.1                             | 797.6               | 25.2                | 96.8                 |
|                                              | 30.3                             | 110.4               | 4.0                 | 96.0                 |
|                                              | 37.5                             | 50.3                | 2.5                 | 95.0                 |
|                                              | 46.6                             | 31.8                | 1.6                 | 95.0                 |
| CdS <sub>0.57</sub> Se <sub>0.43</sub> /CdSe | 24.1                             | 633.6               | 15.9                | 97.5                 |
|                                              | 30.3                             | 79.8                | 3.2                 | 96.0                 |
|                                              | 37.5                             | 63.4                | 2.0                 | 96.8                 |
|                                              | 46.6                             | 50.3                | 1.3                 | 97.5                 |
| CdS <sub>0.42</sub> Se <sub>0.58</sub> /CdSe | 24.1                             | 633.6               | 20.0                | 96.8                 |
|                                              | 30.3                             | 100.4               | 4.0                 | 96.0                 |
|                                              | 37.5                             | 63.4                | 2.5                 | 96.0                 |
|                                              | 46.6                             | 40.0                | 2.0                 | 95.0                 |

**Table S2** Calculated  $J_{sc}$ ,  $V_{oc}$ , FF,  $\eta$ , series ( $R_S$ ) and shunt ( $R_{SH}$ ) resistance values for Zn-doped CdS/CdSe, Se-doped CdS/CdSe and ternary CdS<sub>0.57</sub>Se<sub>0.43</sub>/CdSe QDSCs under 1-sun illumination (100 mW/cm<sup>2</sup>).

|                                              | $J_{sc}$<br>(mA/cm <sup>2</sup> ) | $V_{oc}$<br>(mV) | FF<br>(%) | $\eta$<br>(%) | $R_S$<br>(ohm) | $R_{SH}$<br>(ohm) |
|----------------------------------------------|-----------------------------------|------------------|-----------|---------------|----------------|-------------------|
| Zn-doped CdS/CdSe                            | 11.98                             | 517.7            | 51.5      | 3.19          | 61.9           | 1810.4            |
| Se-doped CdS/CdSe                            | 12.08                             | 548.5            | 54.2      | 3.42          | 41.5           | 3150.0            |
| CdS <sub>0.57</sub> Se <sub>0.43</sub> /CdSe | 14.22                             | 566.8            | 55.3      | 4.46          | 35.2           | 5554.6            |
